# Supplementary material for: Performance of HCV Antigen Testing for the Diagnosis and Monitoring of Antiviral Treatment: A Systematic Review and Meta‐Analysis
Source: Hindawi journal article supplement (doi:10.1155/2022/7348755), 2022-01-01
Supplement: f1 [file 7348755.f1.pdf]

Supplementary figures demonstrated the quality of studies. S1 showed the risk of bias, S2 showed the applicability of studies and S3 gives the QUADAS-2 assessment.

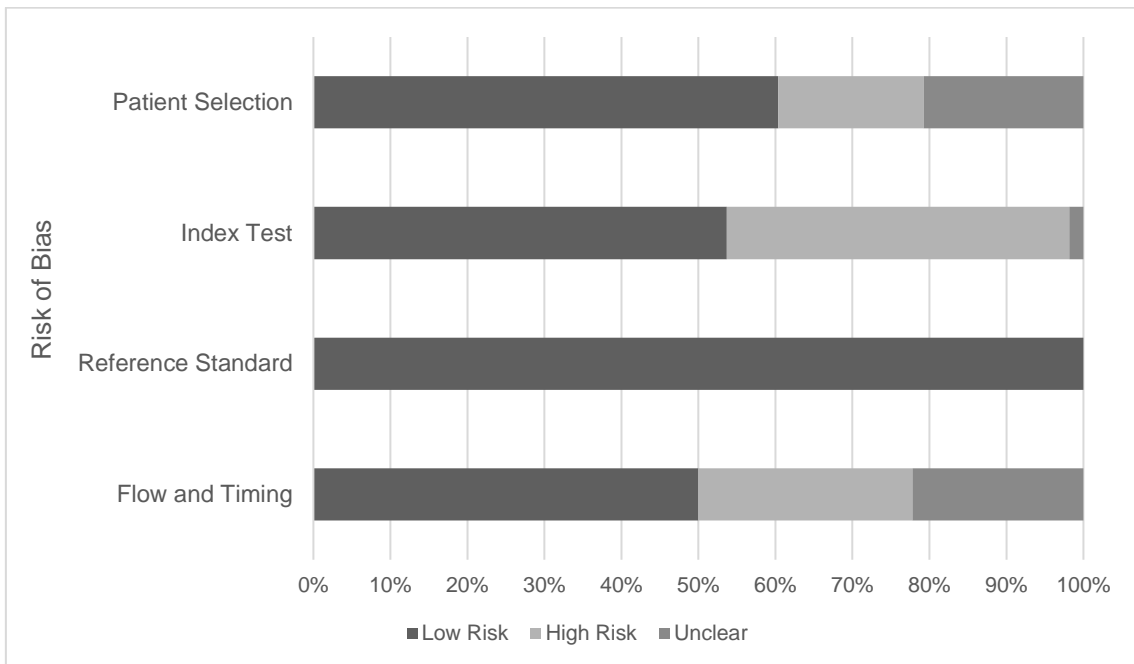

Figure S1. Risk of bias graph

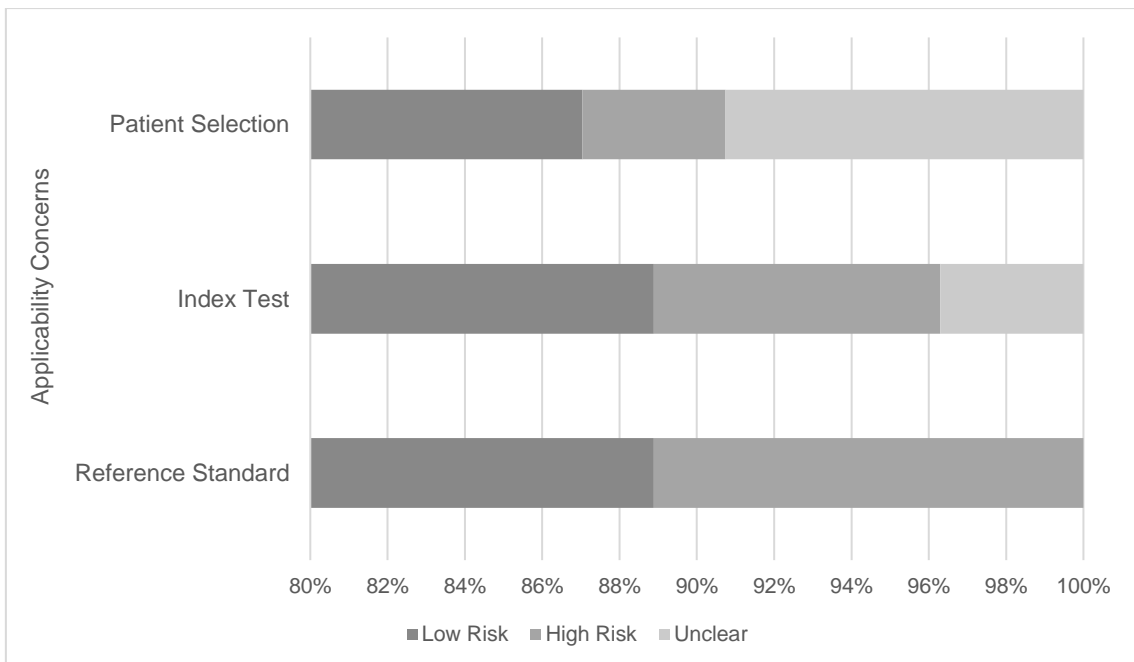

Figure S2. Applicability Concerns graph

Figure S3: QUADAS-2 assessment tool for studies of diagnostic accuracy

| Study                                     | Risk of Bias      |            |                    |                 | Applicability Concerns |            |                    |
|-------------------------------------------|-------------------|------------|--------------------|-----------------|------------------------|------------|--------------------|
|                                           | Patient Selection | Index Test | Reference Standard | Flow and Timing | Patient Selection      | Index Test | Reference Standard |
| Bo Feng et al, 2019 <sup>(35)</sup>       | ☹                 | ☺          | ☺                  | ?               | ☺                      | ☺          | ☺                  |
| Lin et al, 2019 <sup>(36)</sup>           | ☺                 | ☺          | ☺                  | ☺               | ☺                      | ☺          | ☺                  |
| Catlett et al, 2019 <sup>(65)</sup>       | ☺                 | ☺          | ☺                  | ☺               | ☺                      | ☺          | ☺                  |
| Lucejko et al, 2019 <sup>(67)</sup>       | ☹                 | ☺          | ☺                  | ☺               | ☺                      | ☺          | ☺                  |
| Pérez-García et al, 2019 <sup>(66)</sup>  | ☺                 | ☹          | ☺                  | ?               | ☺                      | ☺          | ☺                  |
| Fan et al, 2019 <sup>(37)</sup>           | ☺                 | ☹          | ☺                  | ☺               | ☺                      | ☺          | ☺                  |
| Xiang et al, 2019 <sup>(53)</sup>         | ?                 | ☹          | ☺                  | ☺               | ☺                      | ☺          | ☺                  |
| Van Tiborg et al, 2018 <sup>(38)</sup>    | ☺                 | ☺          | ☺                  | ☹               | ☺                      | ☺          | ☺                  |
| Adland et al, 2018 <sup>(44)</sup>        | ☺                 | ☹          | ☺                  | ☺               | ☺                      | ☺          | ☺                  |
| Lamoury et al, 2018 <sup>(25)</sup>       | ?                 | ☺          | ☺                  | ☹               | ☺                      | ☺          | ☺                  |
| Nguyen et al, 2018 <sup>(23)</sup>        | ☹                 | ☹          | ☺                  | ?               | ☺                      | ☺          | ☺                  |
| Chevaliez et al, 2018 <sup>(14)</sup>     | ☺                 | ☺          | ☺                  | ☹               | ?                      | ☺          | ☺                  |
| Wasitthanasim et al, 2017 <sup>(30)</sup> | ☺                 | ☹          | ☺                  | ?               | ☺                      | ☺          | ☺                  |
| Loggi et al, 2017 <sup>(39)</sup>         | ☹                 | ☹          | ☺                  | ☹               | ☺                      | ☺          | ☺                  |
| Lucejko et al, 2017 <sup>(43)</sup>       | ☺                 | ☺          | ☺                  | ?               | ☺                      | ☺          | ☺                  |
| Arboledas et al, 2017 <sup>(46)</sup>     | ☺                 | ☺          | ☺                  | ☺               | ☺                      | ☺          | ☺                  |
| Lamoury et al, 2017 <sup>(11)</sup>       | ☺                 | ☹          | ☺                  | ?               | ☺                      | ☺          | ☺                  |
| Wang et al, 2017 <sup>(22)</sup>          | ☺                 | ☹          | ☺                  | ☺               | ☺                      | ☹          | ☺                  |
| Alonso et al, 2017 <sup>(34)</sup>        | ☺                 | ☺          | ☺                  | ☺               | ☺                      | ☺          | ☺                  |
| Mohamed et al, 2017 <sup>(24)</sup>       | ☺                 | ☺          | ☺                  | ☹               | ☺                      | ☺          | ☹                  |
| Talal et al, 2017 <sup>(54)</sup>         | ☺                 | ☺          | ☺                  | ☺               | ☺                      | ☺          | ☺                  |
| Rockstroh et al, 2017 <sup>(15)</sup>     | ?                 | ☹          | ☺                  | ☹               | ☺                      | ☺          | ☺                  |
| Kim et al, 2016 <sup>(40)</sup>           | ?                 | ☹          | ☺                  | ☹               | ☺                      | ☺          | ☺                  |
| Aghemo et al, 2016 <sup>(13)</sup>        | ☹                 | ☹          | ☺                  | ☹               | ☺                      | ☺          | ☺                  |
| Pischke et al, 2016 <sup>(56)</sup>       | ☺                 | ☺          | ☺                  | ☹               | ☺                      | ☺          | ☺                  |

|                                              |   |   |   |   |   |   |   |
|----------------------------------------------|---|---|---|---|---|---|---|
| Garbuglia et al, 2015 <sup>(57)</sup>        | 😊 | 😊 | 😊 | 😊 | 😊 | 😊 | 😊 |
| Kamal et al, 2015 <sup>(41)</sup>            | 😊 | 😞 | 😊 | 😊 | 😊 | 😊 | 😊 |
| Florea et al, 2014 <sup>(42)</sup>           | 😊 | 😊 | 😊 | 😊 | 😊 | 😊 | 😊 |
| Long et al, 2014 <sup>(29)</sup>             | 😊 | 😞 | 😊 | ? | 😊 | 😊 | 😊 |
| Chevaliez et al, 2014 <sup>(69)</sup>        | 😊 | 😊 | 😊 | 😞 | 😊 | 😊 | 😊 |
| Garbuglia et al, 2014 <sup>(58)</sup>        | 😞 | ? | 😊 | 😊 | 😊 | 😊 | 😊 |
| Heidrich et al, 2014 <sup>(59)</sup>         | 😊 | 😊 | 😊 | 😊 | 😊 | 😊 | 😊 |
| Hadziyannis et al, 2013 <sup>(60)</sup>      | 😊 | 😞 | 😊 | 😊 | 😊 | 😊 | 😊 |
| Tedder et al, 2013 <sup>(10)</sup>           | 😞 | 😞 | 😊 | ? | 😊 | 😊 | 😞 |
| Mederacke et al, 2012 <sup>(28)</sup>        | 😊 | 😊 | 😊 | 😞 | 😊 | 😊 | 😞 |
| Murayama et al, 2012 <sup>(21)</sup>         | 😊 | 😞 | 😊 | 😊 | 😊 | 😞 | 😊 |
| Vermehren et al, 2012 <sup>(68)</sup>        | ? | 😊 | 😊 | 😊 | 😊 | 😊 | 😊 |
| Kesli et al, 2011 <sup>(52)</sup>            | 😊 | 😊 | 😊 | 😊 | 😞 | 😊 | 😞 |
| Moscato et al, 2011 <sup>(31)</sup>          | ? | 😊 | 😊 | 😞 | 😊 | 😊 | 😞 |
| Miedouge et al, 2010 <sup>(61)</sup>         | 😊 | 😞 | 😊 | ? | 😊 | 😊 | 😊 |
| Ross et al, 2010 <sup>(62)</sup>             | ? | 😊 | 😊 | ? | 😊 | 😊 | 😊 |
| Medhi et al, 2008 <sup>(63)</sup>            | 😊 | 😊 | 😊 | 😊 | ? | ? | 😊 |
| Reddy et al, 2006 <sup>(27)</sup>            | ? | 😊 | 😊 | 😊 | 😞 | 😞 | 😊 |
| Masahiko Takashi et al, 2005 <sup>(33)</sup> | 😊 | 😞 | 😊 | 😊 | 😊 | 😊 | 😊 |
| Leperche et al, 2005 <sup>(7)</sup>          | ? | 😊 | 😊 | 😞 | 😞 | 😊 | 😊 |
| Massaguer et al, 2005 <sup>(64)</sup>        | 😞 | 😞 | 😊 | ? | 😊 | 😊 | 😊 |
| Fabrizi et al, 2005 <sup>(50)</sup>          | 😊 | 😊 | 😊 | ? | 😞 | 😊 | 😊 |
| Bouzgarrou et al, 2005 <sup>(26)</sup>       | ? | 😞 | 😊 | 😞 | 😊 | 😊 | 😊 |
| Gonzalez et al, 2005 <sup>(20)</sup>         | 😊 | 😞 | 😊 | 😊 | 😊 | 😊 | 😊 |
| Sofredini et al, 2004 <sup>(32)</sup>        | ? | 😊 | 😊 | 😊 | 😊 | 😊 | 😊 |
| Lorenzo et al, 2004 <sup>(51)</sup>          | 😊 | 😊 | 😊 | 😊 | 😊 | 😊 | 😊 |
| Schuttler et al, 2004 <sup>(19)</sup>        | 😞 | 😞 | 😊 | 😊 | 😊 | 😞 | 😊 |
| Tanaka et al, 2003 <sup>(49)</sup>           | 😊 | 😊 | 😊 | 😞 | 😞 | ? | 😊 |
| Ballardini et al, 1997 <sup>(19)</sup>       | 😞 | 😞 | 😊 | 😊 | 😊 | 😊 | 😞 |

|  |
|--|
|  |
|  |

☺ = Low risk   ☹ = High risk   ? = Unclear risk
